# Supplementary material for: Identification of broadly neutralizing antibody epitopes in the HIV-1 envelope glycoprotein using evolutionary models
Source: Springer Nature journal article supplement (doi:10.1186/1743-422x-10-347), 2013-12-01

**Figure S1 A**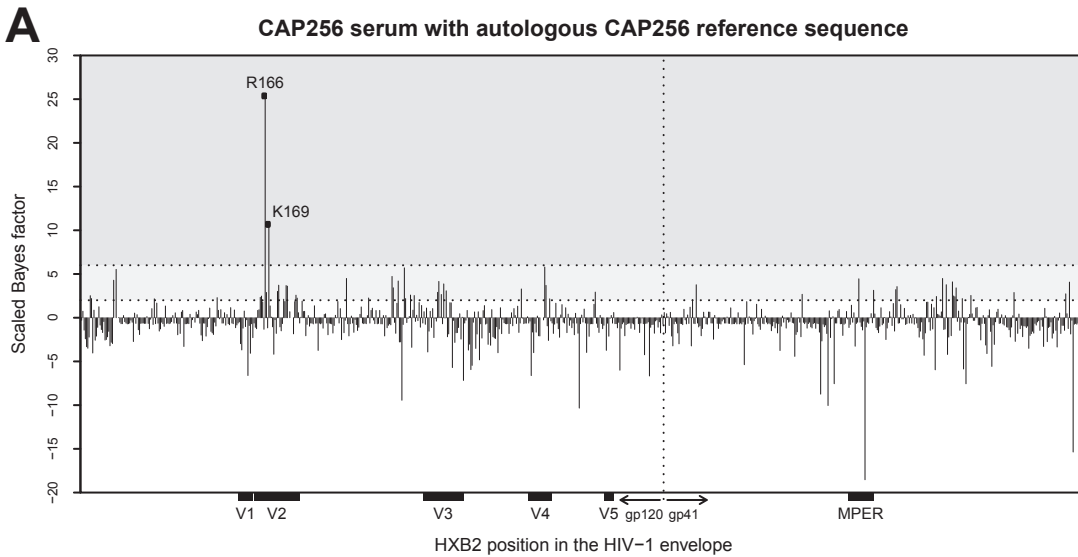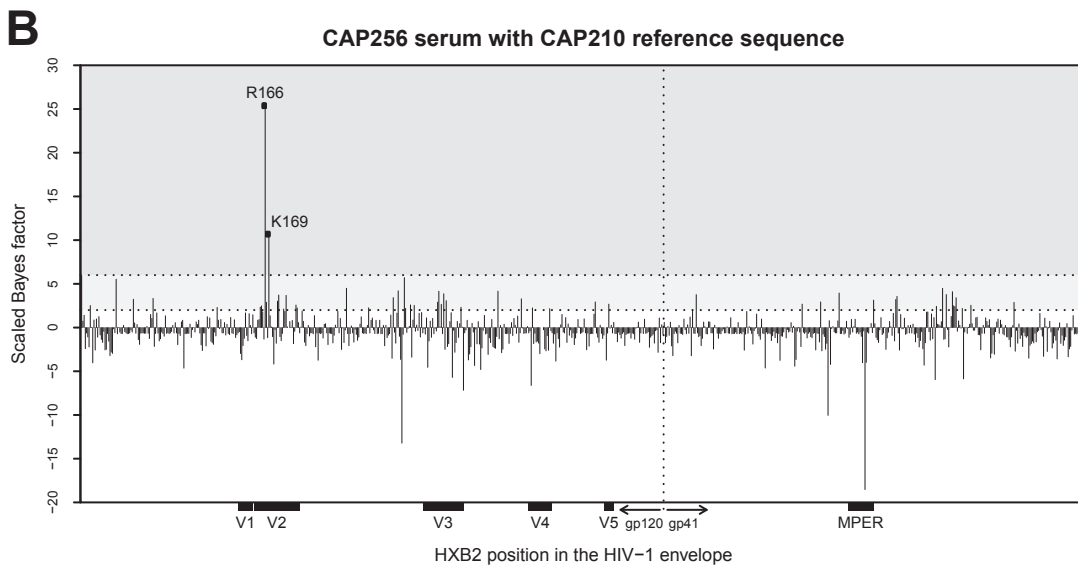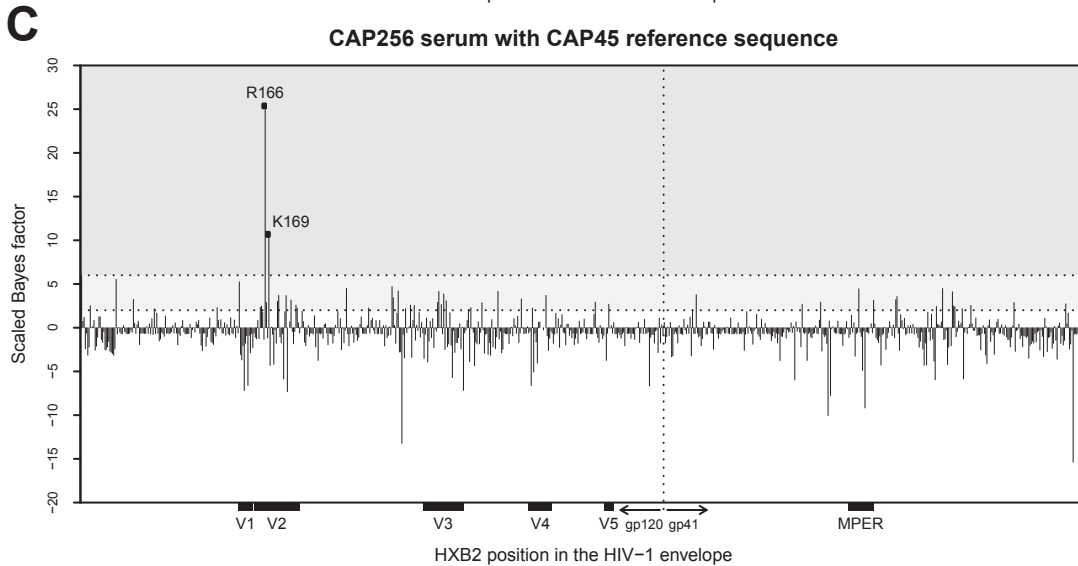**D**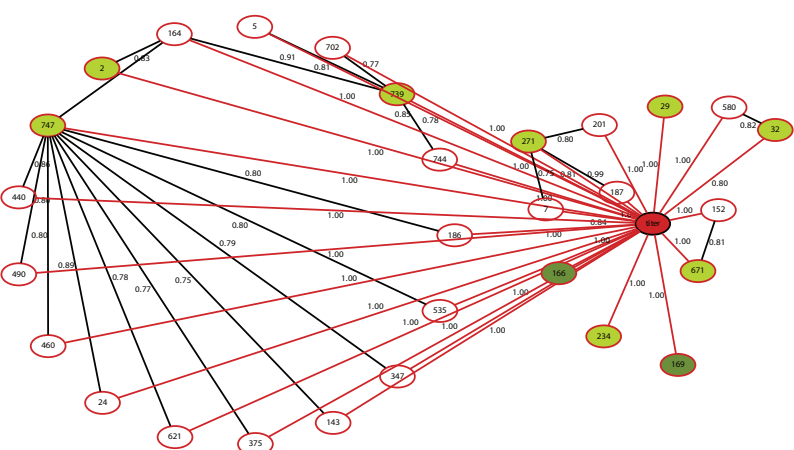**E**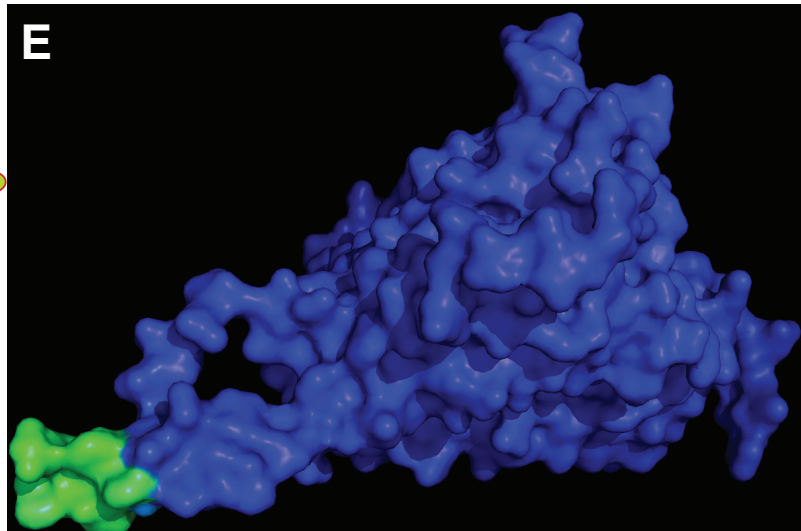

Figure S2

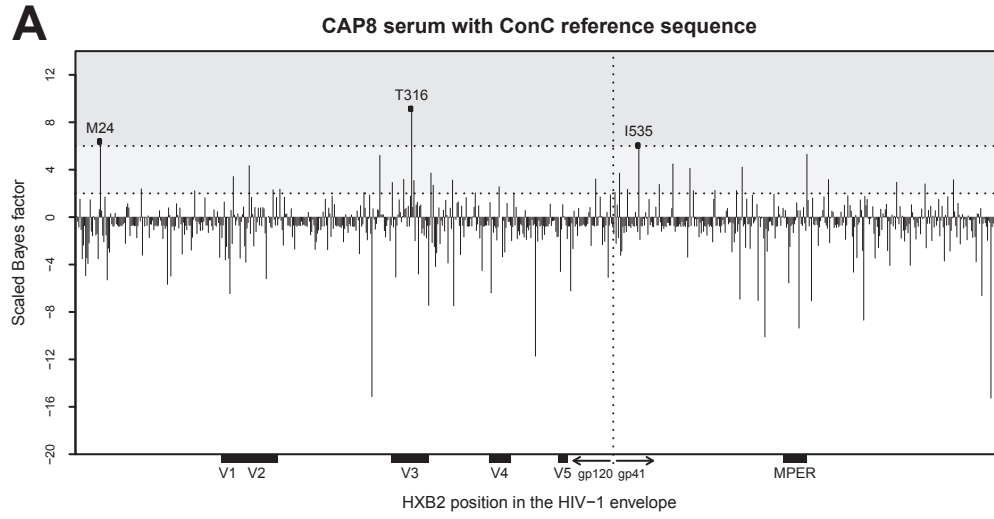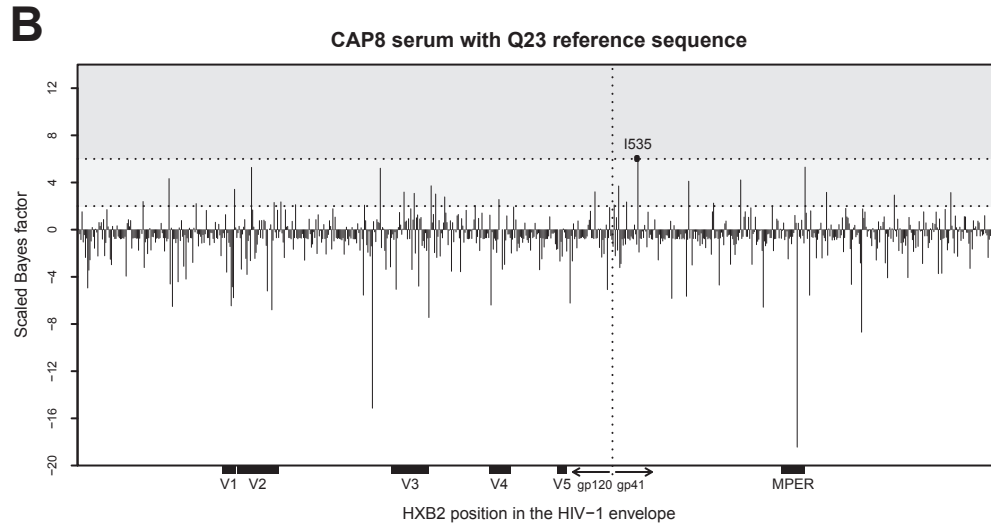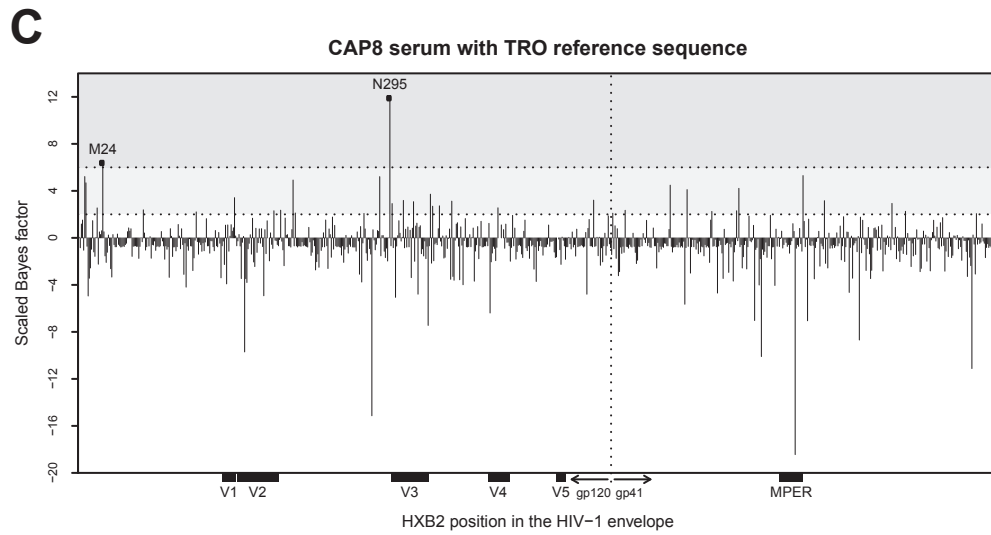

**D**

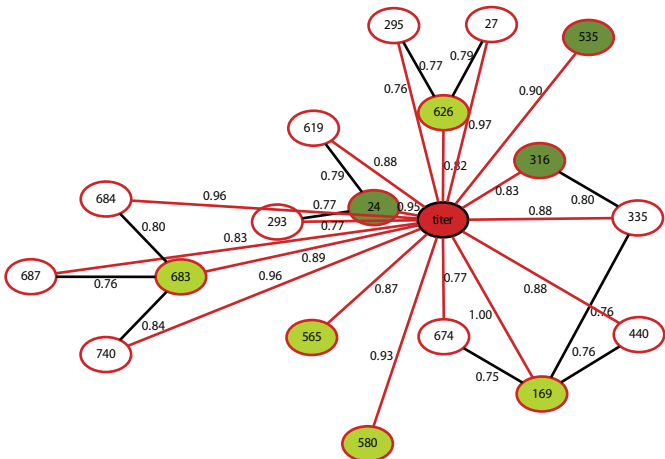

**E**

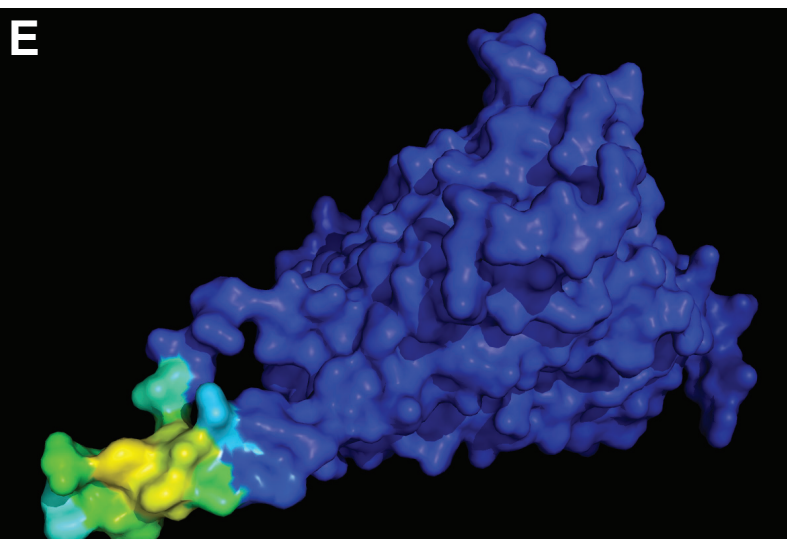

Figure S3

**A**

CAP257 serum with ConC reference sequence

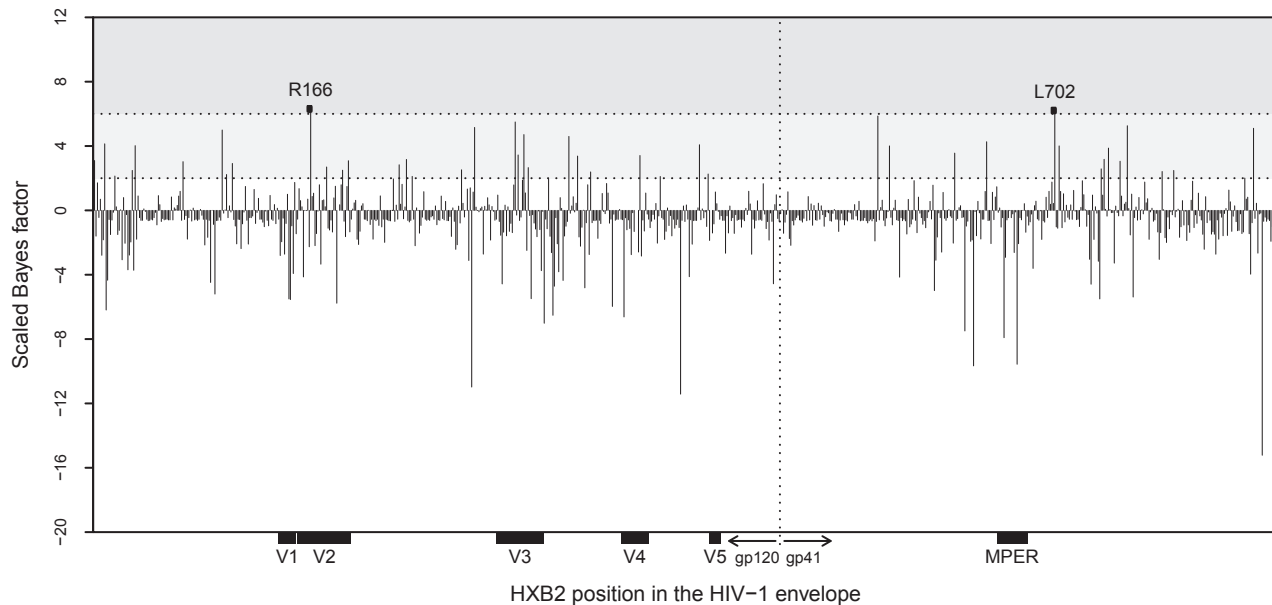

**B**

CAP257 serum with Q842 reference sequence

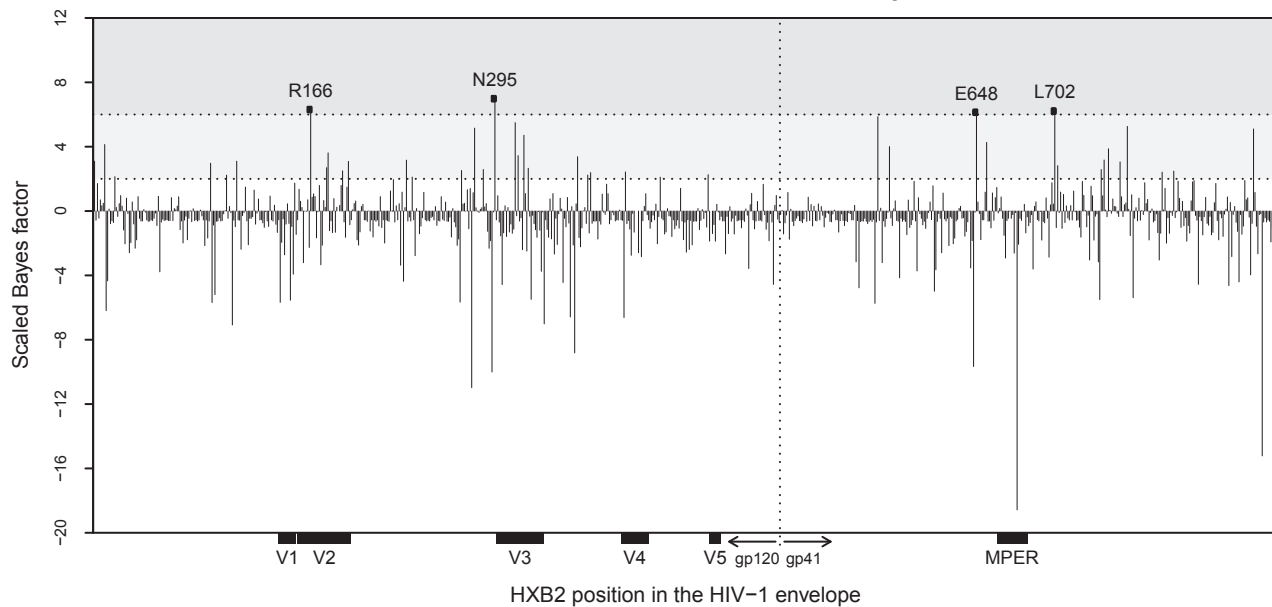

**C**

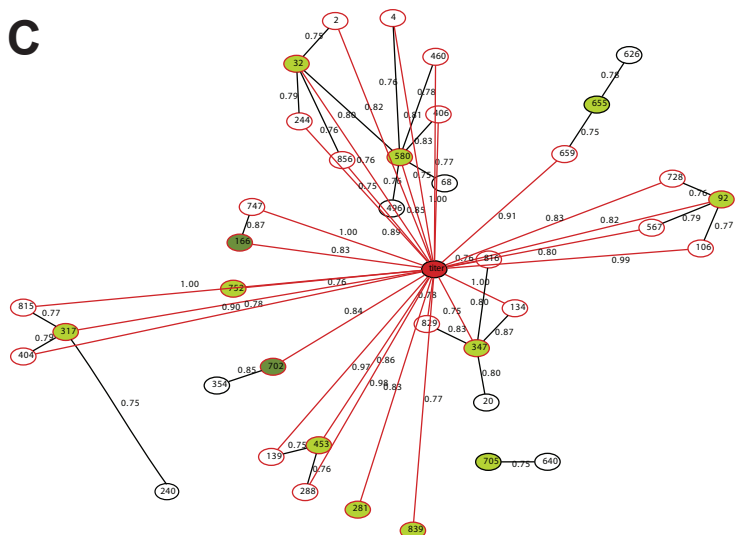

**D**

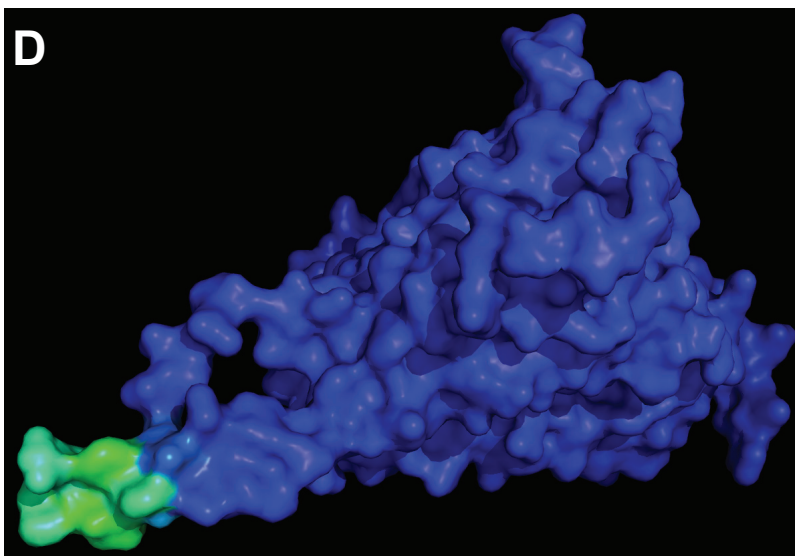

# A Figure S4

## CAP255 serum with autologous CAP255 reference sequence

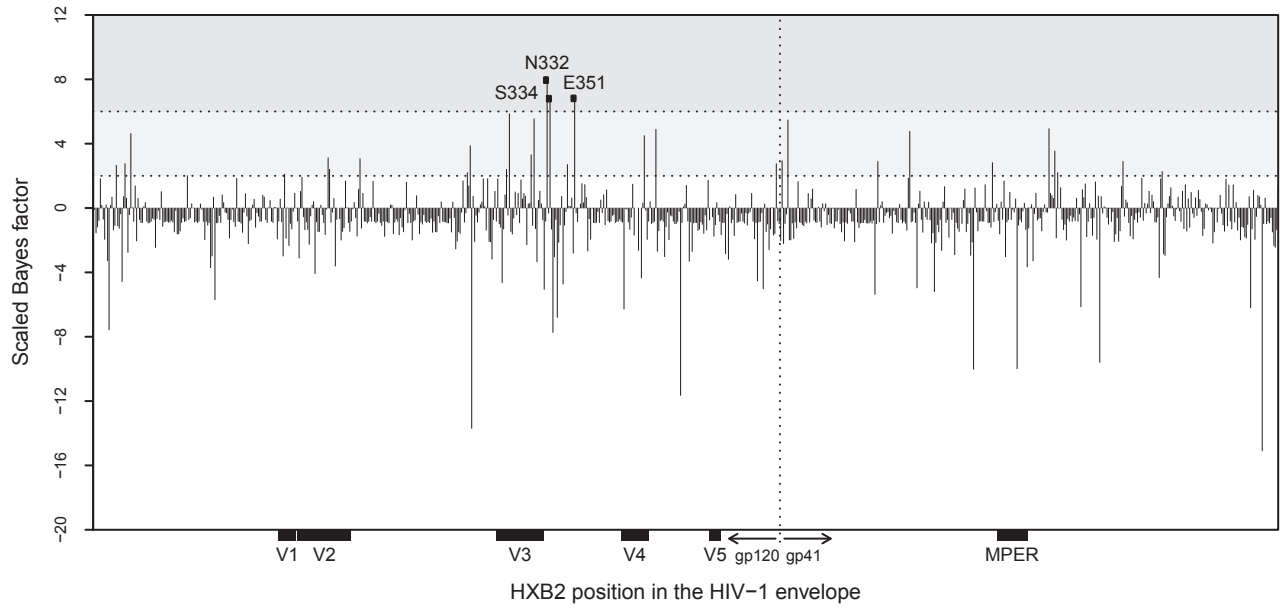

## B

## CAP255 serum with TRO reference sequence

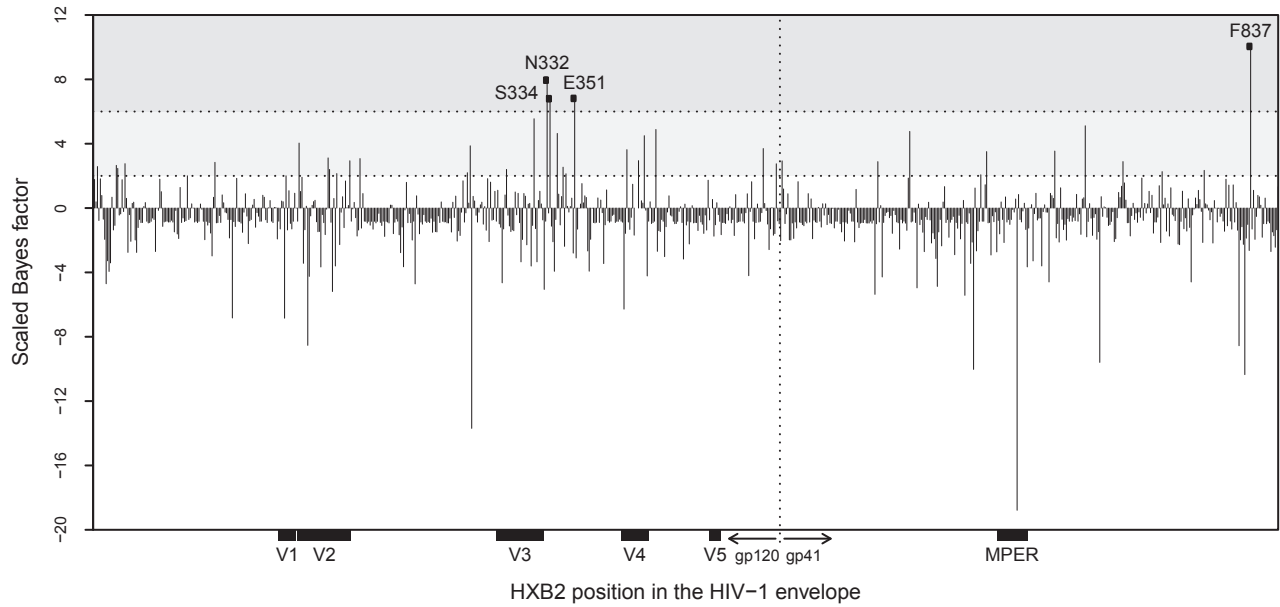

## C

## CAP255 serum with Q23 reference sequence

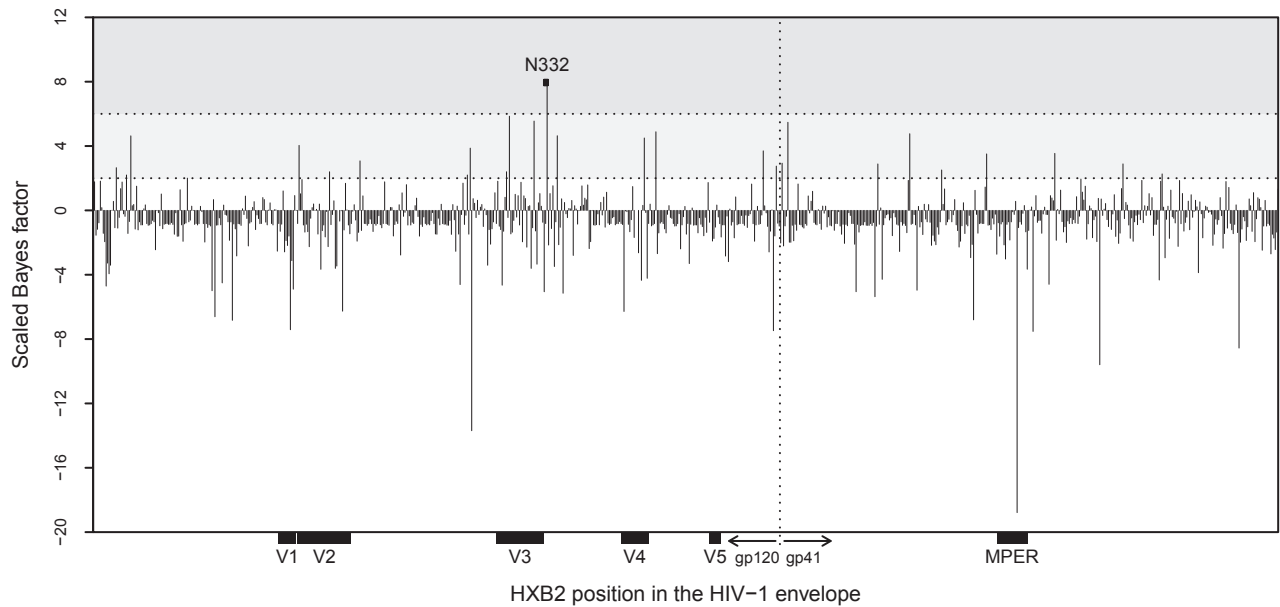

Figure S5

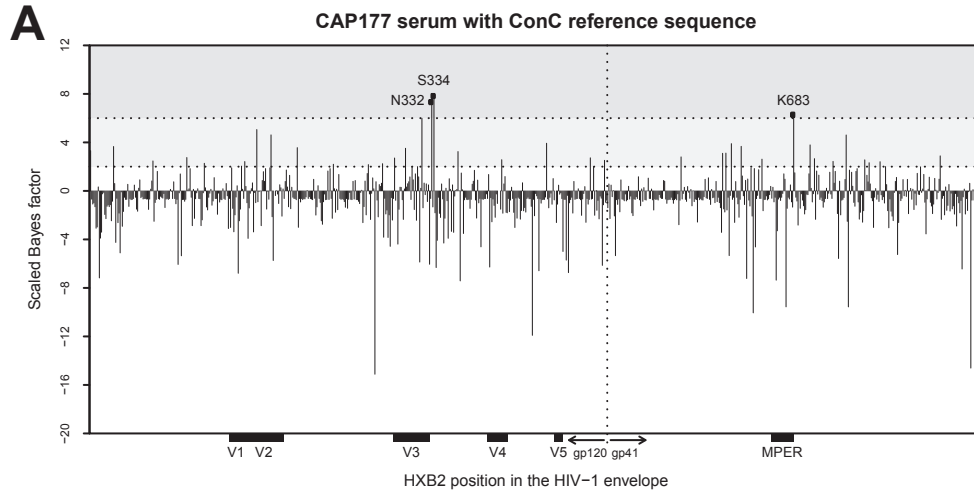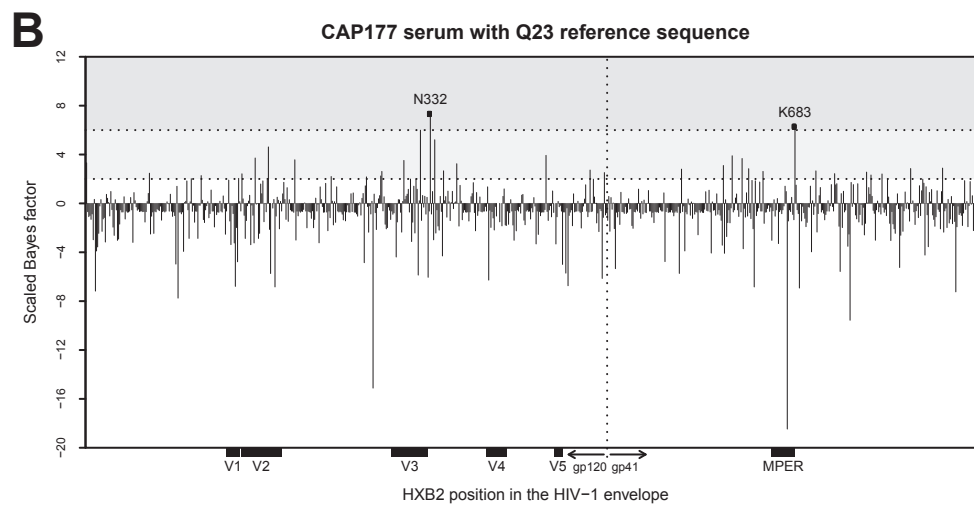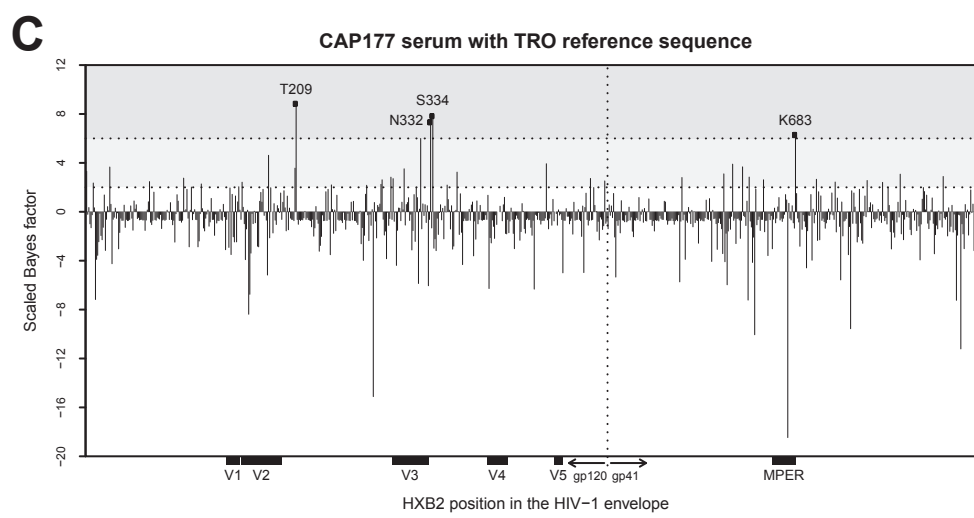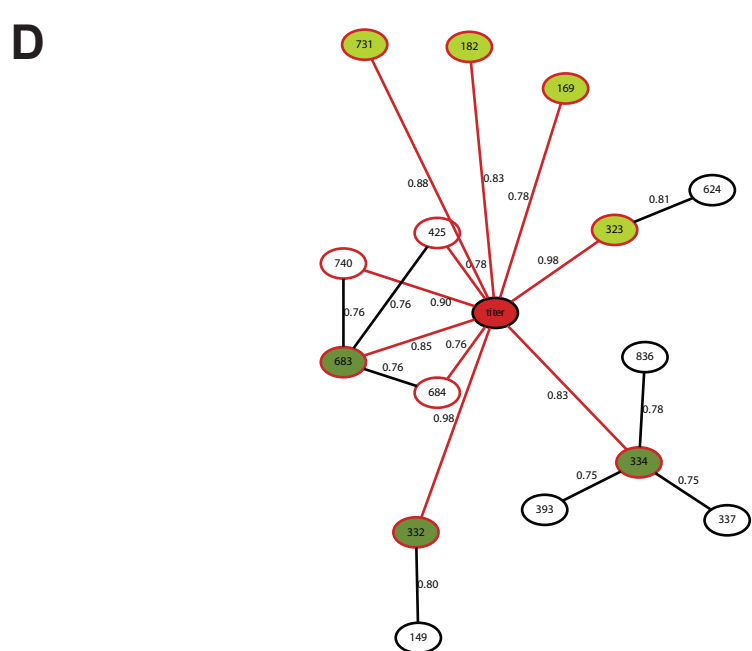

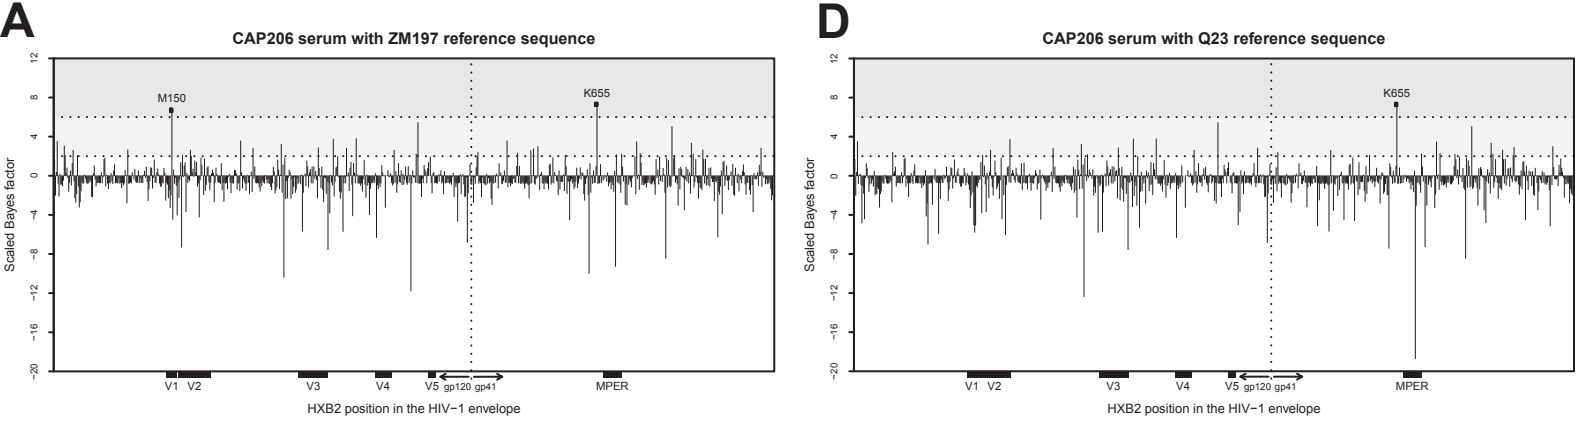

Figure S6

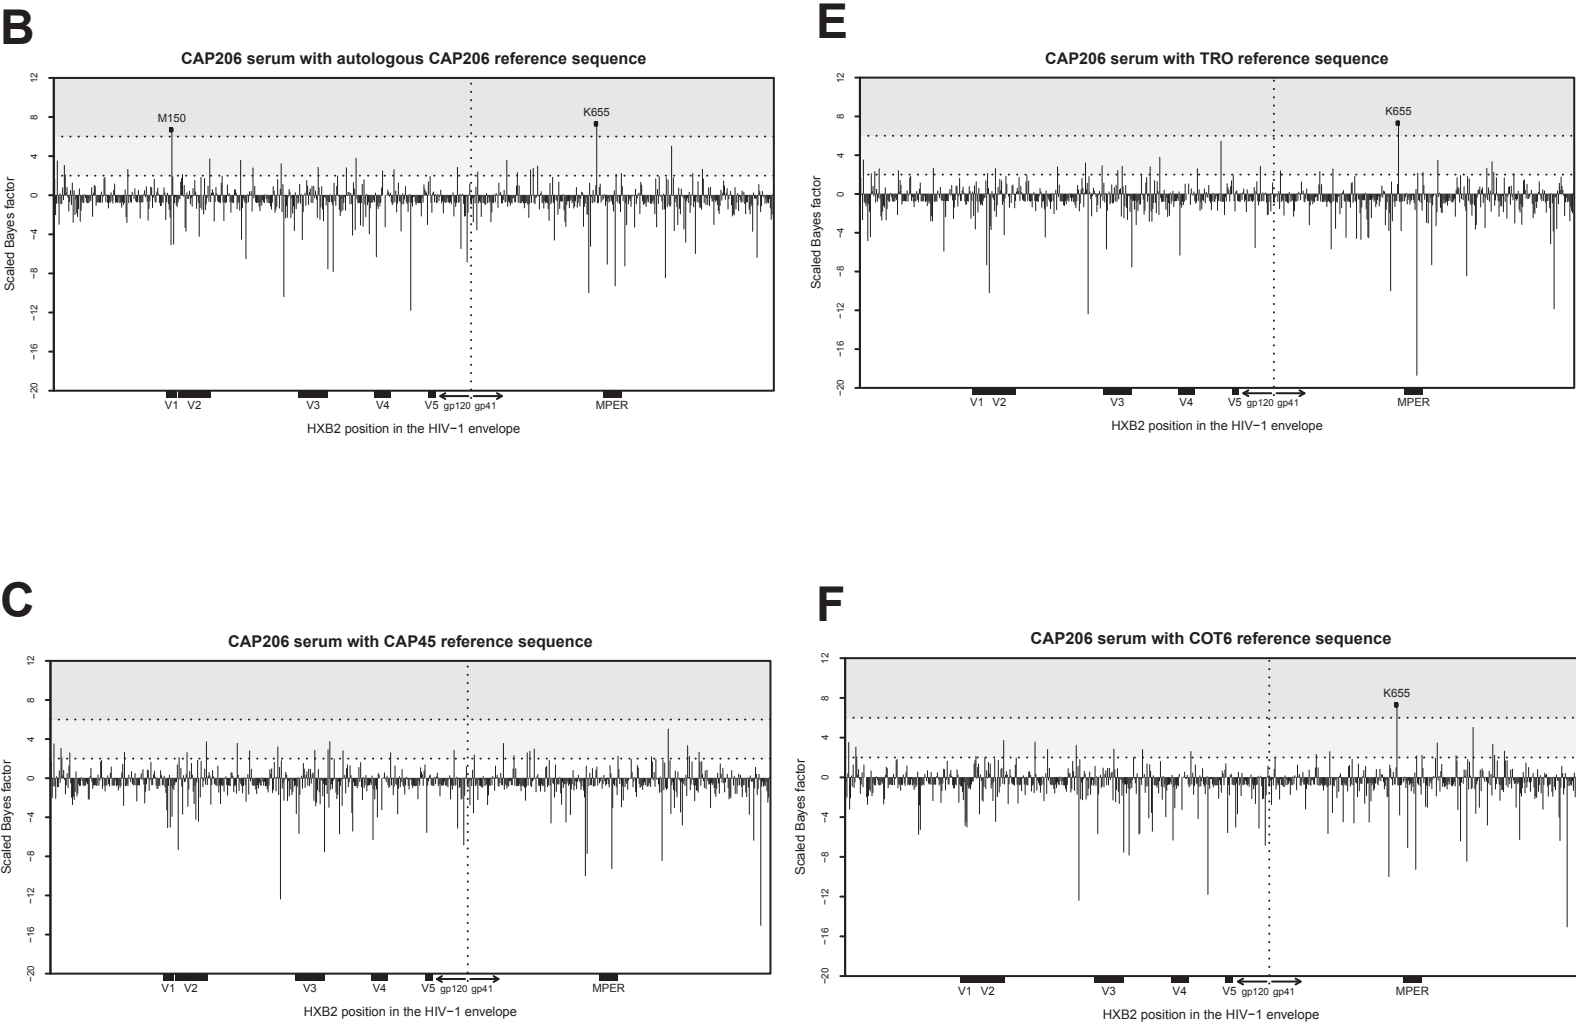

**G**

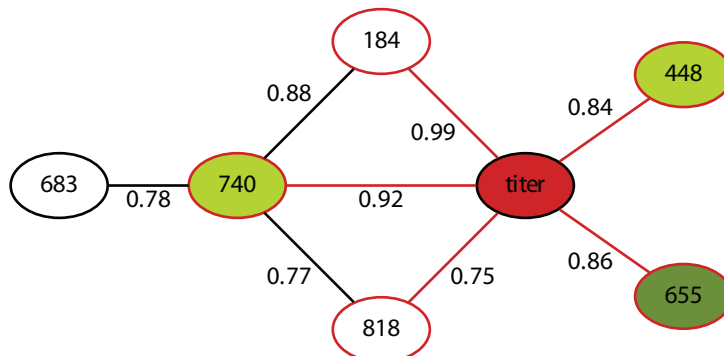

Figure S7

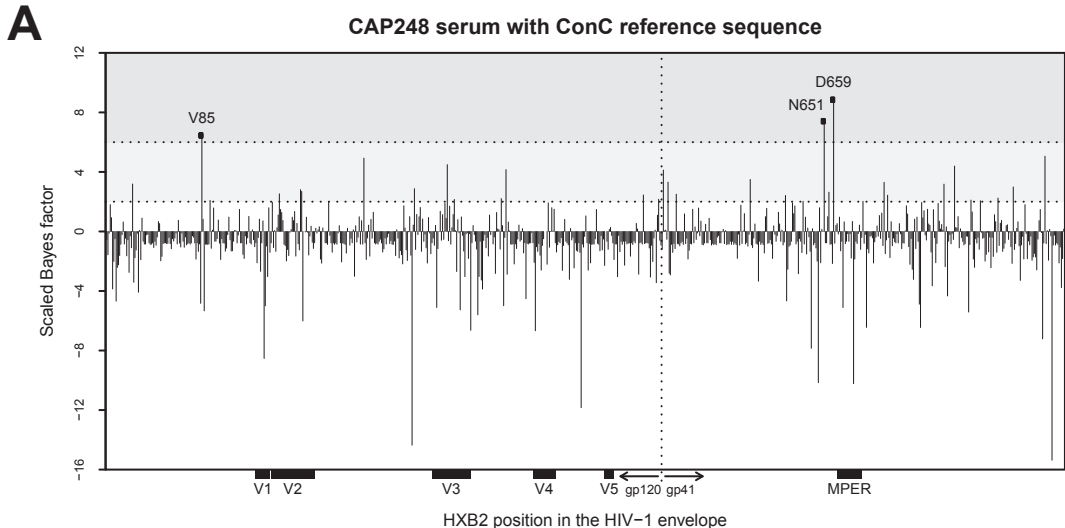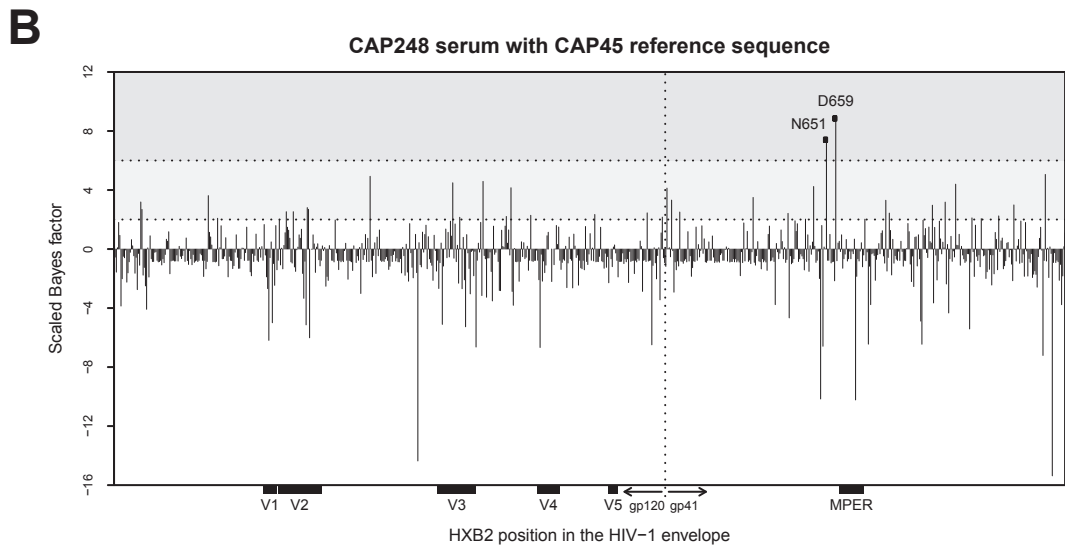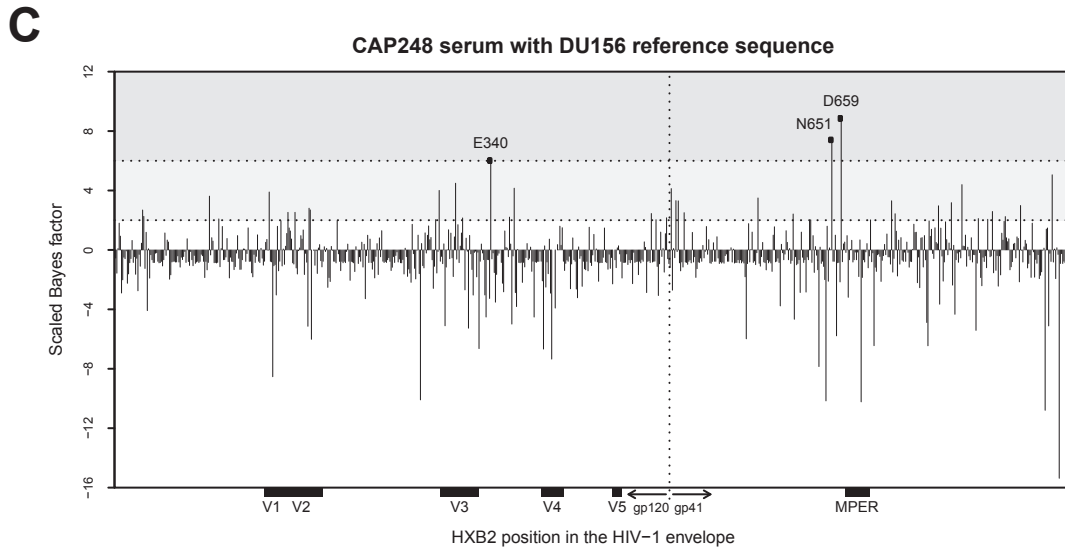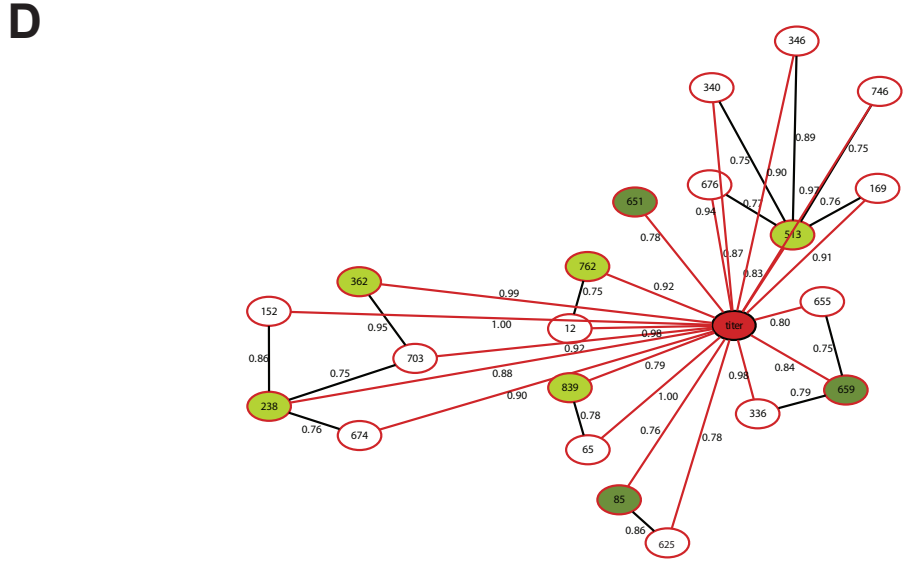

Figure S8

CAP256 serum with ConC reference sequence

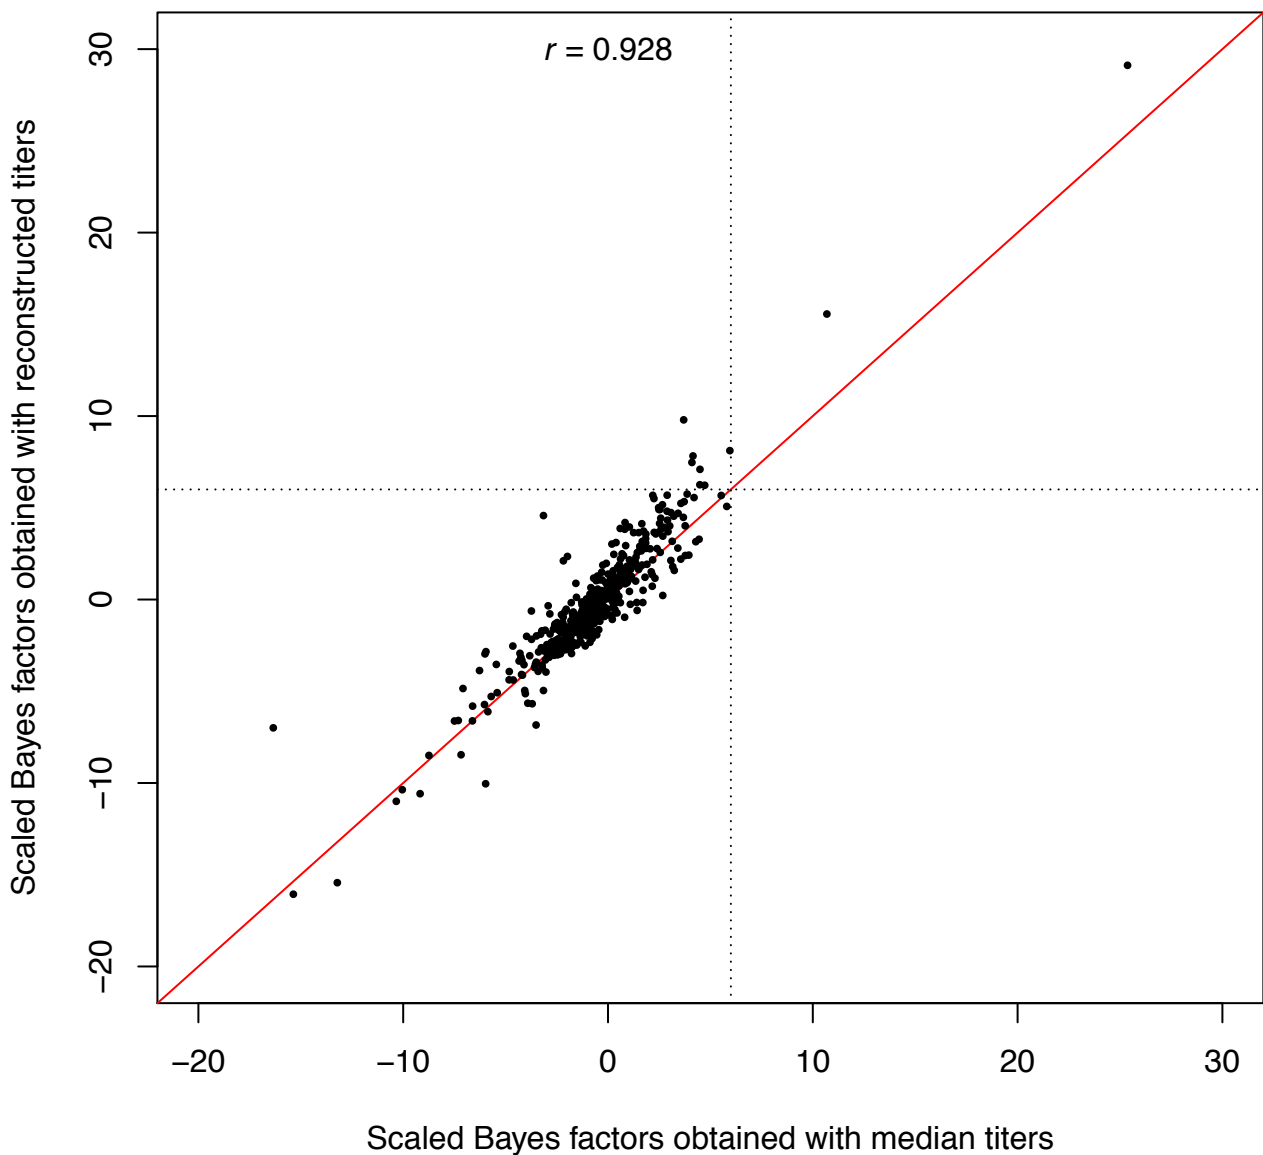

Supplement: 12985_2013_2338_MOESM1_ESM.pdf [file 12985_2013_2338_MOESM1_ESM.pdf]
