# Supplementary figures and images for: Identification of broadly neutralizing antibody epitopes in the HIV-1 envelope glycoprotein using evolutionary models
Source: Springer Nature journal article supplement (doi:10.1186/1743-422x-10-347), 2013-12-01

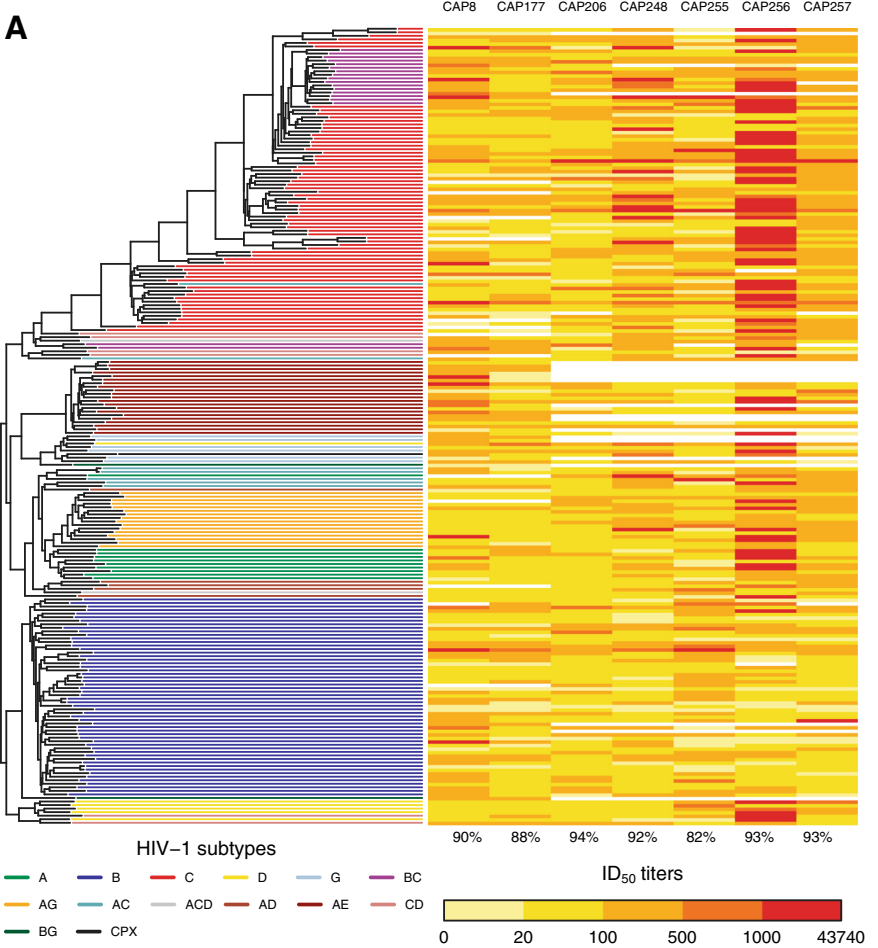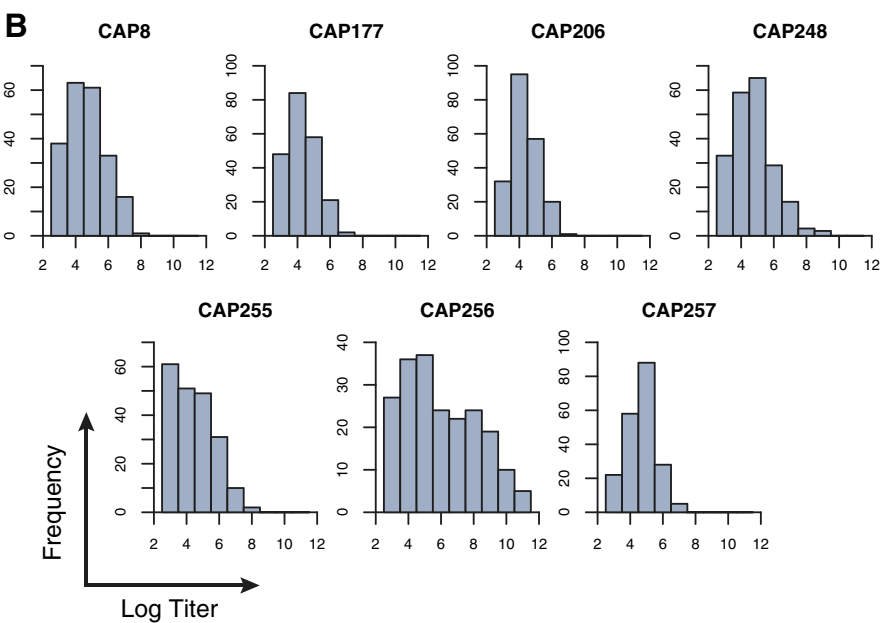

Supplement: 12985_2013_2338_MOESM5_ESM.pdf [file 12985_2013_2338_MOESM5_ESM.pdf]

# CAP256 serum with ConC reference sequence

Scaled Bayes factor

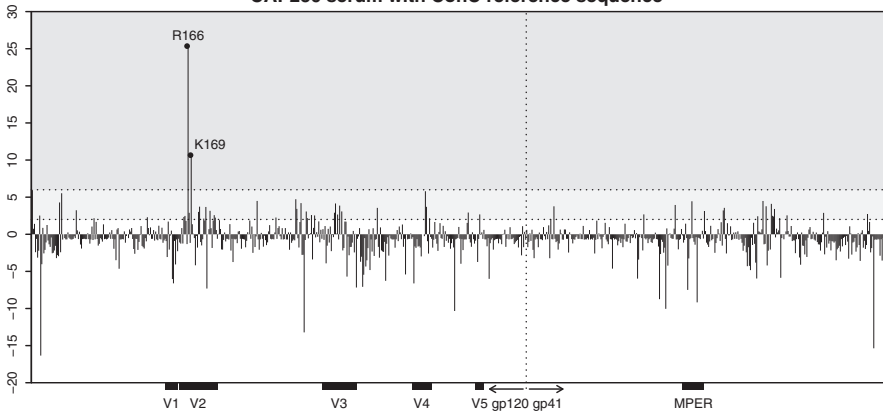

HXB2 position in the HIV-1 envelope

Supplement: 12985_2013_2338_MOESM6_ESM.pdf [file 12985_2013_2338_MOESM6_ESM.pdf]

# CAP255 serum with ConC reference sequence

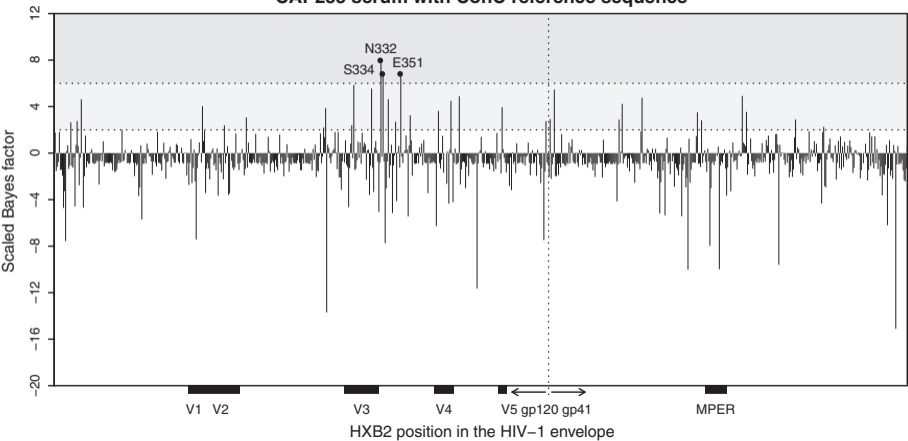

Supplement: 12985_2013_2338_MOESM7_ESM.pdf [file 12985_2013_2338_MOESM7_ESM.pdf]

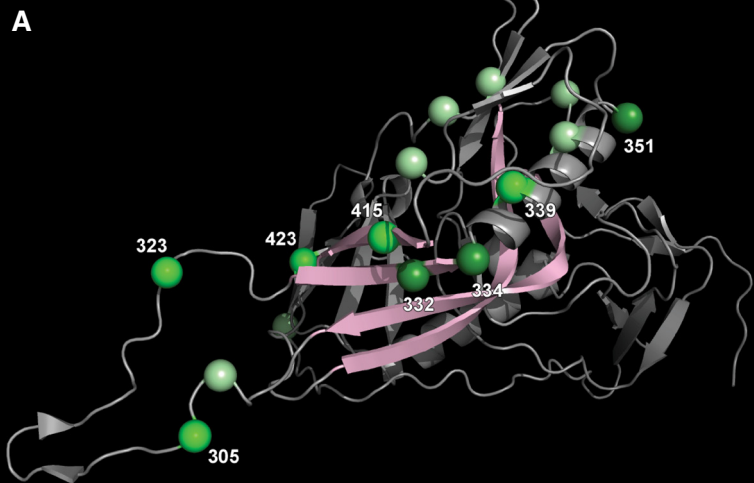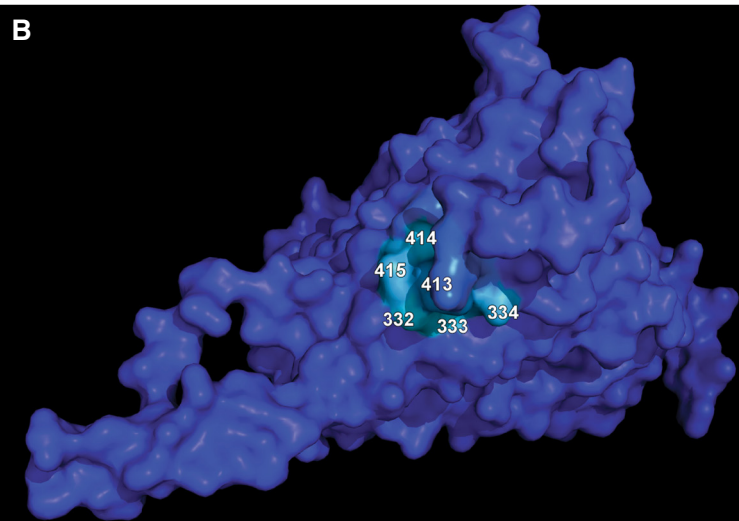

Supplement: 12985_2013_2338_MOESM8_ESM.pdf [file 12985_2013_2338_MOESM8_ESM.pdf]

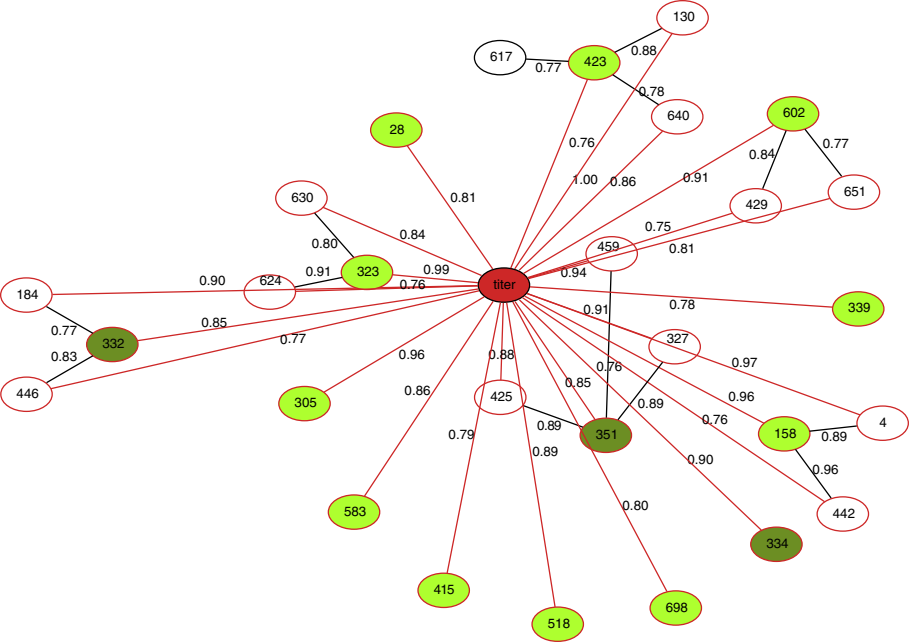

Supplement: 12985_2013_2338_MOESM9_ESM.pdf [file 12985_2013_2338_MOESM9_ESM.pdf]
